# Supplementary material for: Viral Diversity and Its Relationship With Environmental Factors at the Surface and Deep Sea of Prydz Bay, Antarctica
Source: Front Microbiol. 2018 Dec 3;9:2981. doi: 10.3389/fmicb.2018.02981 (PMC6287040; doi:10.3389/fmicb.2018.02981)
Supplement: Table S3 — Detailed information of selected environmental DNA viromes available on MetaVir2. [file Table_3.XLSX]

## Sheet: Detailed information
MetaVir project ID	Sample	Habitat type	Location
8183	PBOb	Seawater	Prydz Bay, Antarctica
8184	PBI4s	Seawater	Prydz Bay, Antarctica
8185	PBI3	Seawater	Prydz Bay, Antarctica
8186	PBI1	Seawater	Prydz Bay, Antarctica
8187	PBI4b	Seawater	Prydz Bay, Antarctica
8188	PBI2	Seawater	Prydz Bay, Antarctica
8189	PBOs	Seawater	Prydz Bay, Antarctica
12	Sargasso Sea-2005	Seawater	Sargasso Sea, Atlantic Ocean
14	British Columbia-96-2004	Seawater	British Columbia coastal areas, eastern North Pacific Ocean
15	Arctic Vir-2002	Seawater	Arctic Ocean
42	Coral Atoll Palmyra	Seawater	Northern Line Islands, Pacific Ocean
43	Coral Atoll Tabueran	Seawater	Northern Line Islands, Pacific Ocean
44	Coral Atoll Kiritimati	Seawater	Northern Line Islands, Pacific Ocean
1357	Dunk_Island_TT-3	Seawater	Dunk Island, Great Barrier Reef, Western Pacific Ocean
1358	Fitzroy_Island_F1	Seawater	Fitzroy Island, Great Barrier Reef, Western Pacific Ocean
1392	LJ12S	Seawater	LineP transect, intermediate ocean station, eastern North Pacific Ocean
1396	LA26S	Seawater	LineP transect, open ocean station, eastern North Pacific Ocean
1409	LJ4S	Seawater	LineP transect, coastal station, eastern North Pacific Ocean
1430	M4OS	Seawater	MBARI transect, open ocean station, eastern North Pacific Ocean
1438	M2MS	Seawater	MBARI transect, intermediate ocean station, eastern North Pacific Ocean
1440	M1CS	Seawater	MBARI transect, coastal station, eastern North Pacific Ocean
1477	GS112	Seawater	Indian ocean
1478	GS108	Seawater	Coccos Keeling, inside Lagoon, Indian ocean
1479	GS117	Seawater	Saint-Anne Island, Indian ocean
1480	GS122	Seawater	Between Madagascar and South Africa, Indian ocean
3816	ALOHA station deep abyss	Seawater	North of Hawaii, Pacific Ocean
5754	B47_Bohai_Sea_Sep_2010	Seawater	Bohai Sea, Western Pacific Ocean
6750	JRE_Assembly_Default	Estuarine water	Jiulong River Estuary, China
33	Tilapia Channel - 1105	Freshwater	Salton Sea (Kent SeaTech), USA
34	Tilapia Channel - 0406	Freshwater	Salton Sea (Kent SeaTech), USA
35	Tilapia Channel - 0806	Freshwater	Salton Sea (Kent SeaTech), USA
36	Prebead pond - 0406	Freshwater	Salton Sea (Kent SeaTech), USA
1327	Lake Bourget contigs	Freshwater	Lake Bourget, France
1328	Lake Pavin contigs	Freshwater	Lake Pavin, France
2734	AllContigs-VCJUL-1	Freshwater	Lake Lanier, USA
2736	AllContigs-VCSEP-2A	Freshwater	Lake Lanier, USA
5053	Lough Neagh - 4pW contigs	Freshwater	Lough Neagh, UK
11	Antarctic Lake Summer	Freshwater	Lake Limnopolar, Antarctica
3295	Arctic SvL1contigs	Freshwater	Arctic lake, Spitsbergen
3296	Arctic IR1contigs	Freshwater	Arctic lake, Spitsbergen
3297	Arctic IR2contigs	Freshwater	Arctic lake, Spitsbergen
3298	Arctic SvL2contigs	Freshwater	Arctic lake, Spitsbergen
3299	Arctic Lv1contigs	Freshwater	Arctic lake, Spitsbergen
2473	Antarctic open soil contigs	Hyperarid desert soil	Miers Valley, Antarctica
1700	P5_Ngallou	Hypersaline	Ngallou, Senegal
1702	P6_Lake_Retba	Hypersaline	Lake Retba, Senegal
1705	P9_Ngallou	Hypersaline	Ngallou, Senegal
